# Supplementary material
Source: PubMed Central journal article supplement (PMC3718292)
Supplement: NIHMS483908-supplement-Suppl_Data_1.pdf [file NIHMS483908-supplement-Suppl_Data_1.pdf]

**Online Resource**

**Table 1. Clade A HIV gag peptide pools used in the ELISpot assay**

|        |        |                    |        |        |                  |
|--------|--------|--------------------|--------|--------|------------------|
| Pool 1 | HIVA1  | PIVQNAQQQM HQALS   | Pool 2 | HIVA23 | PIPPGQMREPRGSDI  |
|        | HIVA2  | AQQQM HQALSPRTL    |        | HIVA24 | GQMREPRGSDIAGTT  |
|        | HIVA3  | GQM HQALSPRTLNAWV  |        | HIVA25 | EPRGSDIAGTTSTLQ  |
|        | HIVA4  | ALSPRTLNAWVKVIE    |        | HIVA26 | SDIAGTTSTLQEQIG  |
|        | HIVA5  | RTLNAWVKVIEEKAF    |        | HIVA27 | GTTSTLQEQIGWMTS  |
|        | HIVA6  | AWVKVIEEKAFSPEV    |        | HIVA28 | TLQEQIGWMTSNPPI  |
|        | HIVA7  | VIEEKAFSPEVIPMF    |        | HIVA29 | EQIGWMTSNPPIPVGD |
|        | HIVA8  | KAFSPEVIPMFSALS    |        | HIVA30 | MTSNPPIPVGDYKR   |
|        | HIVA9  | PEVIPMFSALSEGAT    |        | HIVA31 | PPIPVGDIYKRWIL   |
|        | HIVA10 | PMFSALSEGATPQDL    |        | HIVA32 | VGDIYKRWILGLNK   |
|        | HIVA11 | ALSEGATPQDLNML     |        | HIVA33 | YKRWILGLNKIVRM   |
|        | HIVA12 | GATPQDLNMLNIVG     |        | HIVA34 | LNKIVRMYSVP      |
|        | HIVA13 | PQDLNMLNIVGGHQA    |        | HIVA35 | LNKIVRMYSVPSILD  |
|        | HIVA14 | MMLNIVGGHQAAMQM    |        | HIVA36 | VRMYSVPSILDIRQG  |
|        | HIVA15 | IVGGHQAAMQMLKDT    |        | HIVA37 | SPVSILDIRQGPKEP  |
|        | HIVA16 | HQAAMQMLKDTINEE    |        | HIVA38 | ILDIRQGPKEPFRDY  |
|        | HIVA17 | MQMLKDTINEEAAEW    |        | HIVA39 | RQGPKEPFRDYVDRF  |
|        | HIVA18 | KDTINEEAAEWDR LH   |        | HIVA40 | KEPFRDYVDRFFKTL  |
|        | HIVA19 | INEEAAEWDR LH PVHA |        | HIVA41 | RDYVDRFFKTLRAEQ  |
|        | HIVA20 | AEWDR LH PVHAGPIP  |        | HIVA42 | DRFFKTLRAEQATQE  |
|        | HIVA21 | RLHPVHAGPIPPGQM    |        | HIVA43 | KTLRAEQATQEVKNW  |
|        | HIVA22 | VHAGPIPPGQMREPR    |        | HIVA44 | AEQATQEVKNWMTET  |
| Pool 3 | HIVA45 | TQEVKNWMTETLLVQ    | Pool 4 | HIVA68 | SRELERFALNPSLLE  |
|        | HIVA46 | KNWMTETLLVQANP     |        | HIVA69 | ERFALNPSLLETAEG  |
|        | HIVA47 | TETLLVQANPDCKS     |        | HIVA70 | LNPSLLETAEGCQOI  |
|        | HIVA48 | LVQANPDCKSILRA     |        | HIVA71 | LLETAEGCQQIMEQL  |
|        | HIVA49 | ANPDCKSILRALGPG    |        | HIVA72 | AEGCQQIMEQLQSAL  |

|        |                 |        |                  |
|--------|-----------------|--------|------------------|
| HIVA50 | CKSILRALGPGATLE | HIVA73 | CQQIMEQLQSALKTSE |
| HIVA51 | LRALGPGATLEEMMT | HIVA74 | EQLQSALKTSEELKS  |
| HIVA52 | GPGATLEEMMTACQG | HIVA75 | SALKTSEELKSLFNT  |
| HIVA53 | TLEEMMTACQGVGGP | HIVA76 | TSEELKSLFNTVATL  |
| HIVA54 | MMTACQGVGGPGHKA | HIVA77 | LKSLFNTVATLYCVH  |
| HIVA55 | CQGVGGPGHKARVLG | HIVA78 | FNTVATLYCVHQRID  |
| HIVA56 | GGPGHKARVLGTGAR | HIVA79 | ATLYCVHQRIDVKDT  |
| HIVA57 | HKARVLGTGARASVL | HIVA80 | CVHQRIDVKDTKEAL  |
| HIVA58 | VLGTGARASVLSGGK | HIVA82 | KDTKEALDKIEEIQN  |
| HIVA59 | GARASVLSGGKLDWA | HIVA83 | EALDKIEEIQNKSKQ  |
| HIVA61 | GGKLDWEKIRLRPG  | HIVA84 | KIEEIQNKSKQKTQQ  |
| HIVA64 | RPGGKKKYRLKHLVW | HIVA85 | IQNKSKQKTQQAAD   |
| HIVA65 | KKKYRLKHLVWASRE | HIVA86 | SKQKTQQAADTQSS   |
| HIVA66 | RLKHLVWASRELERF | HIVA87 | TQQAADTQSSSKVS   |
| HIVA67 | LVWASRELERFALNP | HIVA89 | TQSSSKVSQNYALKHR |
|        |                 | HIVA90 | KVSQNYALKHRAYEL  |

---
